# Supplementary material for: fac-[Re(CO)3(dmso-O)3](CF3SO3): a new versatile and efficient Re(i) precursor for the preparation of mono and polynuclear compounds containing fac-[Re(CO)3]+ fragments
Source: Royal Society of Chemistry journal article supplement (doi:10.1039/b609853c), 2006-01-01

Electronic Supplementary Information for Dalton Transactions  
This journal is © The Royal Society of Chemistry 2006

***fac*-[Re(CO)<sub>3</sub>(dmsO-O)<sub>3</sub>](CF<sub>3</sub>SO<sub>3</sub>): a new versatile and efficient Re(I) precursor for the preparation of mono and polynuclear compounds containing *fac*-[Re(CO)<sub>3</sub>]<sup>+</sup> fragments.**

Massimo Casanova, Ennio Zangrando, Fabio Munini, Elisabetta Iengo and Enzo Alessio\*

Dipartimento di Scienze Chimiche, Università di Trieste, Via L. Giorgieri 1, 34127 Trieste, Italy

### **Supplementary Information**

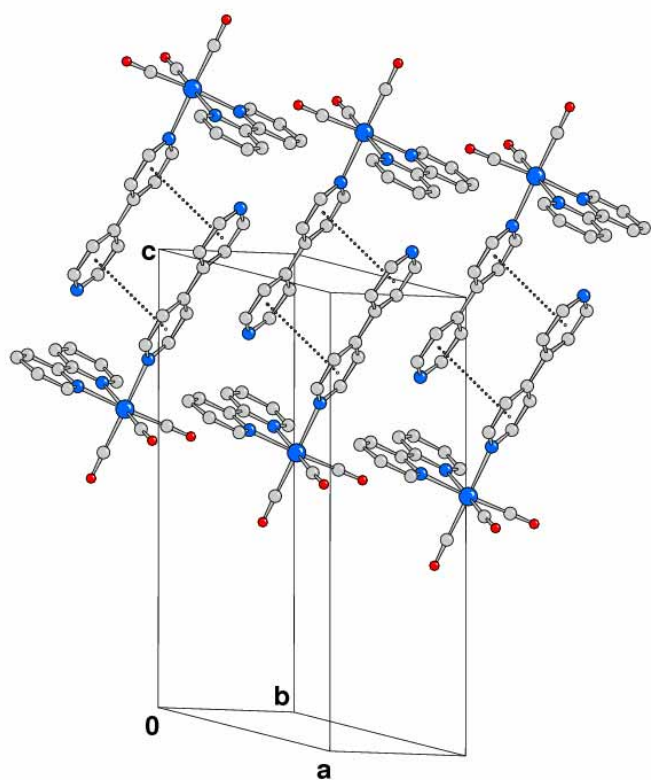

**Figure 1S.** Details of the crystal packing in *fac*-[Re(CO)<sub>3</sub>(bipy)(4,4'-bipy)](CF<sub>3</sub>SO<sub>3</sub>) (7), showing the intramolecular stacking of the 4,4'-bipy ligands.

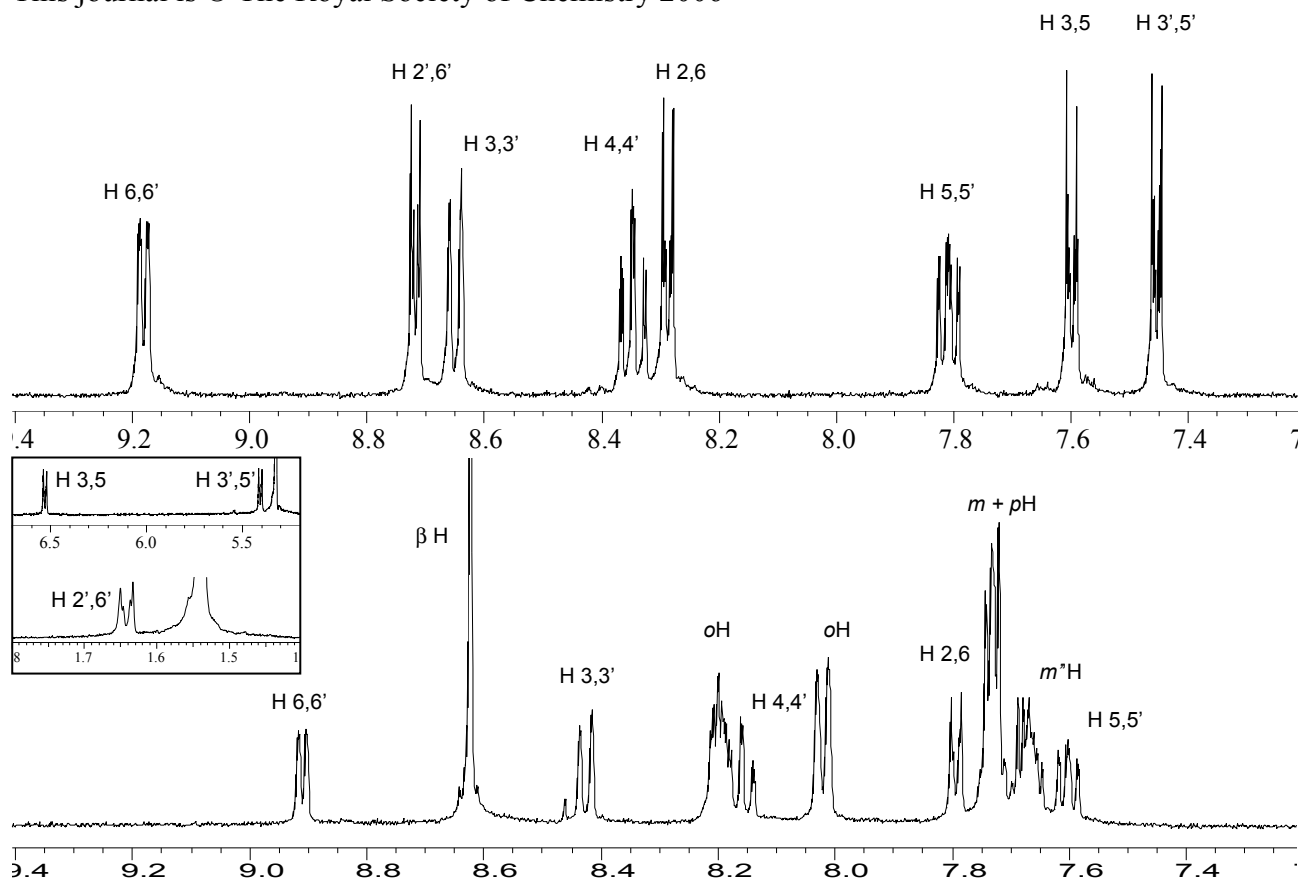

**Figure 2S.** Comparison of the  $^1\text{H}$ -NMR spectra ( $\text{CD}_2\text{Cl}_2$ ) of *fac*- $[\text{Re}(\text{CO})_3(\text{bipy})(4,4'$ -  
*bipy)](\text{CF}\_3\text{SO}\_3) (**7**) (top) and  $[\text{fac}\{-\text{Re}(\text{CO})_3(\text{bipy})\}\{\mu\text{-}4,4'\text{-bipy}\}\{\text{Ru}(\text{CO})(\text{TPP})\}](\text{CF}_3\text{SO}_3)$  (**8**)  
(bottom). See Figure 5 for the labeling scheme.*

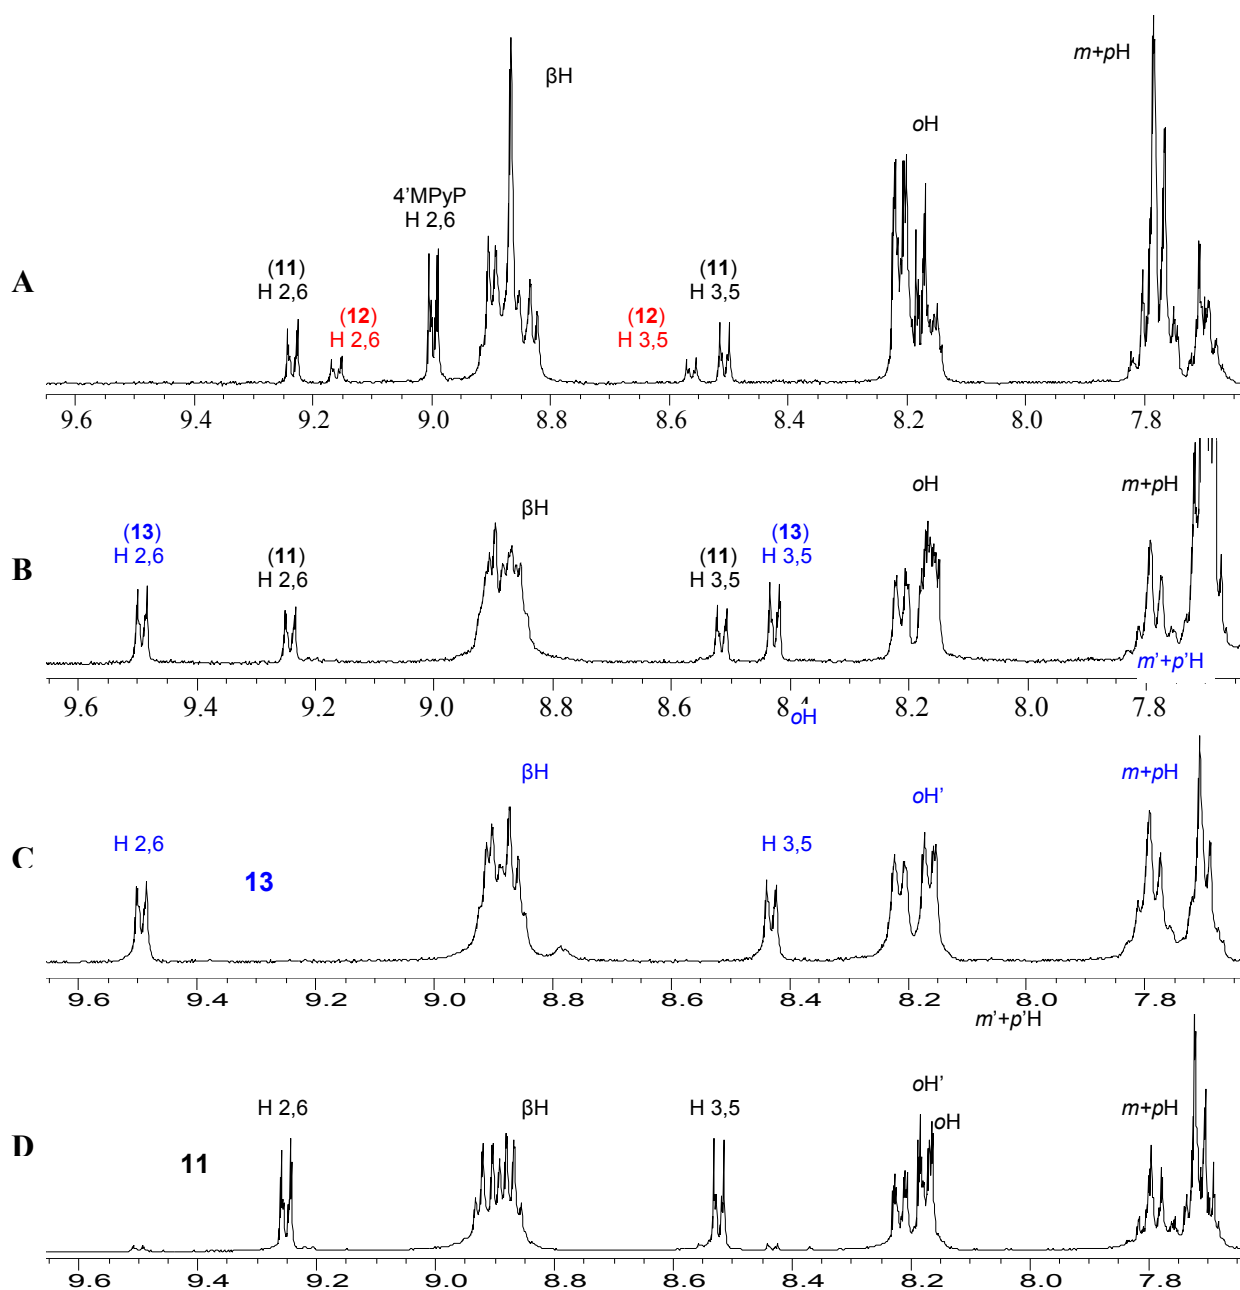

**Figure 3S.** <sup>1</sup>H-NMR spectra (CD<sub>2</sub>Cl<sub>2</sub>) of: **A.** Raw mixture of **11**, **12**, and unreacted 4'MPyP, as obtained from the reaction between **1** and an excess of 4'MPyP before column chromatography; **B.** First band from the first column, containing a mixture of **11** and **13**; **C.** First band from the second column, containing pure *fac*-[ReCl(CO)<sub>3</sub>(4'MPyP)<sub>2</sub>] (**13**); **D.** Second band from the second column, containing almost pure **11**. See Figure 8 (repeated below) for labelling scheme.

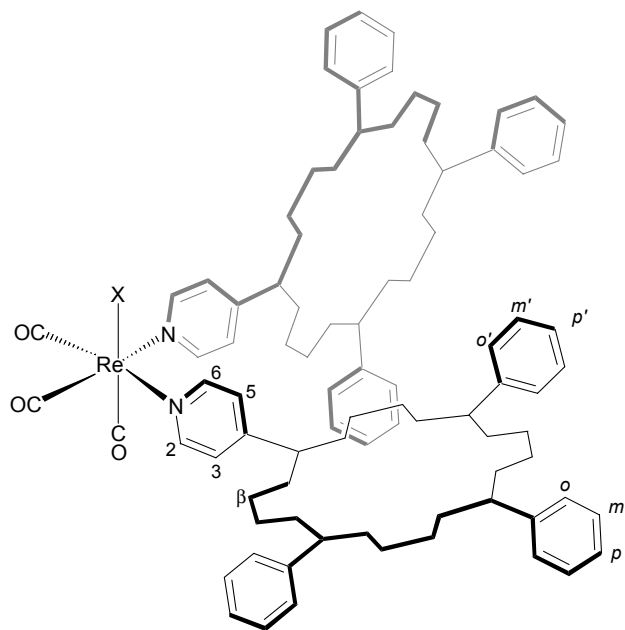

Supplement: b609853c.pdf [file b609853c.pdf]
